# Supplementary material for: In Situ Sampling of NOx Emissions from United States Natural Gas Flares Reveals Heavy-Tail Emission Characteristic
Source: PubMed Central journal article supplement — Environ Sci Technol. 2024 Jan 8;58(3):1509–17. doi: 10.1021/acs.est.3c08095 (PMC10809782; doi:10.1021/acs.est.3c08095), 2024-01-08
Supplement: es3c08095_si_001.pdf [file es3c08095_si_001.pdf]

# Supporting Information

## In-situ sampling of NO<sub>x</sub> emissions from US natural gas flares reveals heavy-tail emission characteristic

*Genevieve Plant<sup>1</sup>, Eric A. Kort<sup>1</sup>, Alan M. Gorchov Negron<sup>1,5</sup>, Yuanlei Chen<sup>2</sup>, Graham Fordice<sup>1,6</sup>,  
Colin Harkins<sup>3,4</sup>*

<sup>1</sup> Climate and Space Sciences and Engineering, University of Michigan, Ann Arbor, MI 48109, United States

<sup>2</sup> Department of Energy Resources Engineering, Stanford University, Stanford, CA 94305, United States

<sup>3</sup> NOAA Chemical Sciences Laboratory (CSL), Boulder, CO, 80305, United States

<sup>4</sup> Cooperative Institute for Research in Environmental Sciences, University of Colorado, Boulder, CO 80309, United States

<sup>5</sup> Now at: Renewable and Sustainable Energy Institute, University of Colorado Boulder, Boulder, CO 80309, United States

<sup>6</sup> Now at: School for Environment and Sustainability, University of Michigan, Ann Arbor, MI 48109 United States

Supporting Information contains:

- 18 pages
- 6 tables
- 9 figures

## 1. Investigation of Potential Drivers

While not the focus of this work's sampling design, we investigate possible correlations of NO<sub>x</sub> flare production with other parameters in our dataset. Using the prevailing wind direction over the targeted flight paths (see Fig. 1), flare intercepts are approximately grouped as likely from the same flare. Note this grouping approach does not incorporate the potentially complex spatial transport of the plume, which we do not characterize with our wind measurements at the aircraft. We find no significant relationship between NO<sub>x</sub> emission factors and wind speed measured at the aircraft (Fig. S5). We do observe the trend that for flare plumes intercepted multiple times, the largest variability in NO<sub>x</sub> EF often coincides with higher average NO<sub>x</sub> EF (Fig. S6). Only in the Eagle Ford do we see a statistically significant relationship between NO<sub>x</sub> production and methane destruction removal efficiency (Fig. S7). The trend between higher observed variability and higher NO<sub>x</sub>, along with potential relationships between inefficient methane destruction and NO<sub>x</sub> emission factors suggest that some flares are malfunctioning and/or operating under conditions that result in performance deviations that are not captured in our current estimates of emissions from these sources.

Linkage of our airborne sampling of flare plumes to ground locations and flare metrics (gas volume, infrastructure age, etc.) is challenging due to potential complexity in the near-field transport of the flare plume, potential flare geolocation in other datasets (e.g. VIIRS), in addition to the connection of well-based information (e.g. Enverus<sup>43</sup>) and flare stack location. Despite the uncertainty in spatially linking these datasets, we explore possible relationships between flare NO<sub>x</sub> production and other factors such as flare volume and well age. While approximate we find no statistically significant correlation between NO<sub>x</sub> emission factor and flare volume and temperature in VIIRS (Fig. S8), or with well age and gas-to-oil ratio in Enverus (Fig. S9). This analysis does not eliminate these factors as potential drivers of flaring NO<sub>x</sub> emissions, but rather indicates that there is not a single, dominant explanatory variable in our observing framework. Further investigation into the root causes of heterogeneity in flare NO<sub>x</sub> production likely requires a different sampling and analysis strategy with more information about specific flare types and operation.

### Figures

- S1. Comparison of NO<sub>x</sub>:CO<sub>2</sub> slopes versus enhancement ratios
- S2. NO<sub>x</sub> emission factor sensitivity test to gas composition assumptions (X<sub>c</sub>)
- S3. GHGRP reported CO<sub>2</sub> content
- S4. Observed NO<sub>x</sub> molecular weights
- S5. NO<sub>x</sub> emission factor versus wind speed
- S6. NO<sub>x</sub> emission factor versus variability across multiple intercepts
- S7. NO<sub>x</sub> Emission factor versus methane destruction removal efficiency
- S8. NO<sub>x</sub> emission factor versus VIIRS flare volume and temperature
- S9. NO<sub>x</sub> emission factor versus Enverus well age and gas to oil ratio

## **Tables**

- S1. Basin Domain Definitions and VIIRS annual flare volumes
- S2. F<sup>3</sup>UEL airborne sampling statistics
- S3. Summary Statistics of Observed NO<sub>x</sub>:CO<sub>2</sub> slopes
- S4. NO<sub>x</sub> Emission Factors (EF) calculated using observationally-derived NO<sub>x</sub> molecular weight and assumption of NO<sub>x</sub> as NO<sub>2</sub>.
- S5. Basin-level NO<sub>x</sub> Flaring Emissions for 2020 compared to FOG Inventory
- S6. Sectoral Breakdown of FOG NO<sub>x</sub> Inventory for 2020

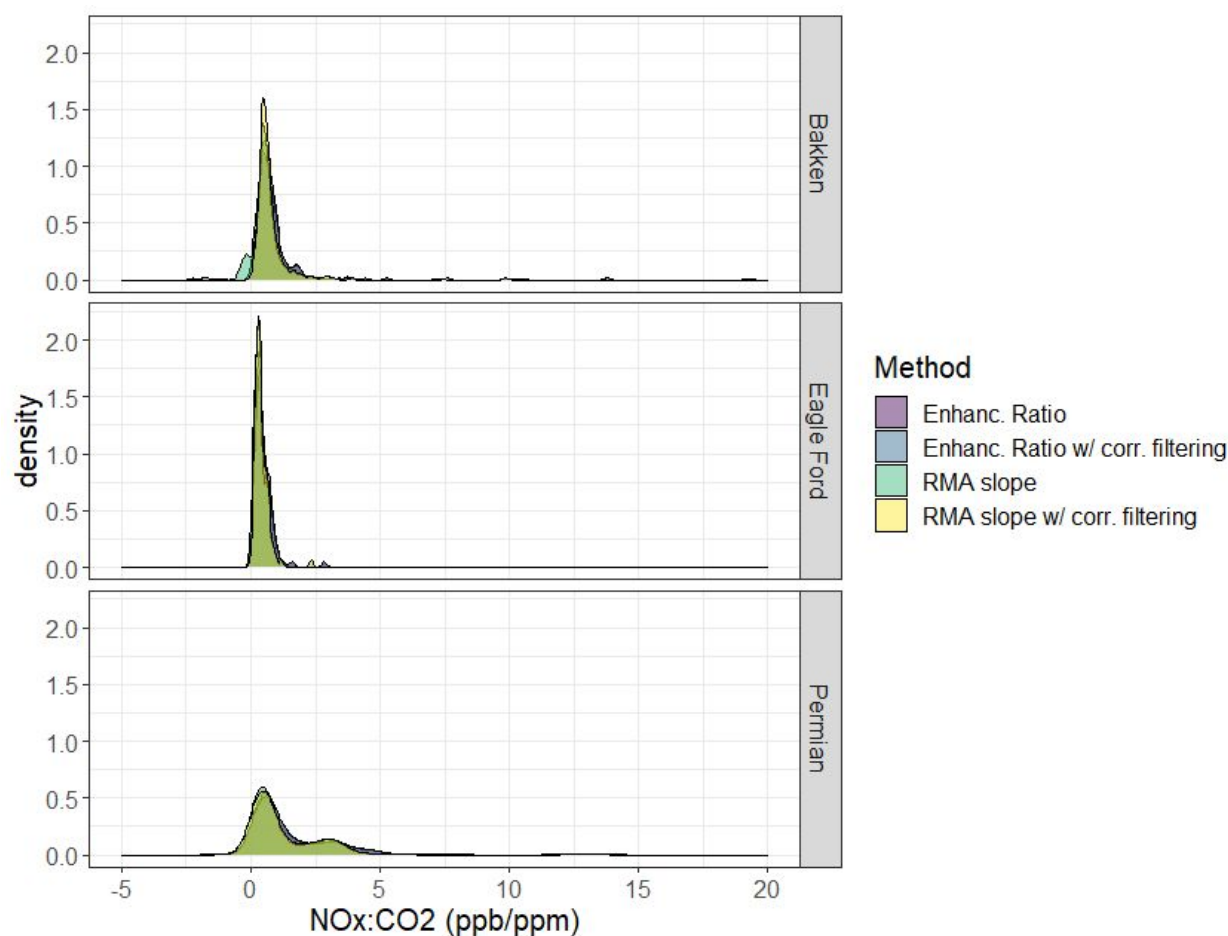

**Figure S1.** Observed NO<sub>x</sub>:CO<sub>2</sub> for the Bakken (top), Eagle Ford (middle), and Permian (bottom) using different analysis methods. Enhancement Ratios are calculated as the ratio of numerically integrated NO<sub>x</sub> and CO<sub>2</sub> enhancements, where the background value for each signal is determined by the 5<sup>th</sup> percentile of the data for each individual flare intercept. Model II ranged major axis (RMA) regressions are performed on the direct signals. A correlation filtering scheme is also applied to both approach, where the correlation between NO<sub>x</sub>:CO<sub>2</sub> and NO<sub>2</sub>:CO<sub>2</sub> is required to be greater than zero to warrant subsequent analysis. The various analysis methods agree well. The difference in mean value for between the enhancement ratio and slope (with positive correlation filtering) is 2%, 12%, and 7% for the Bakken, Eagle Ford, and Permian, respectively. The largest difference is with unfiltered RMA analysis, since it results in occasional negative slopes, pulling down the basin-wide average.

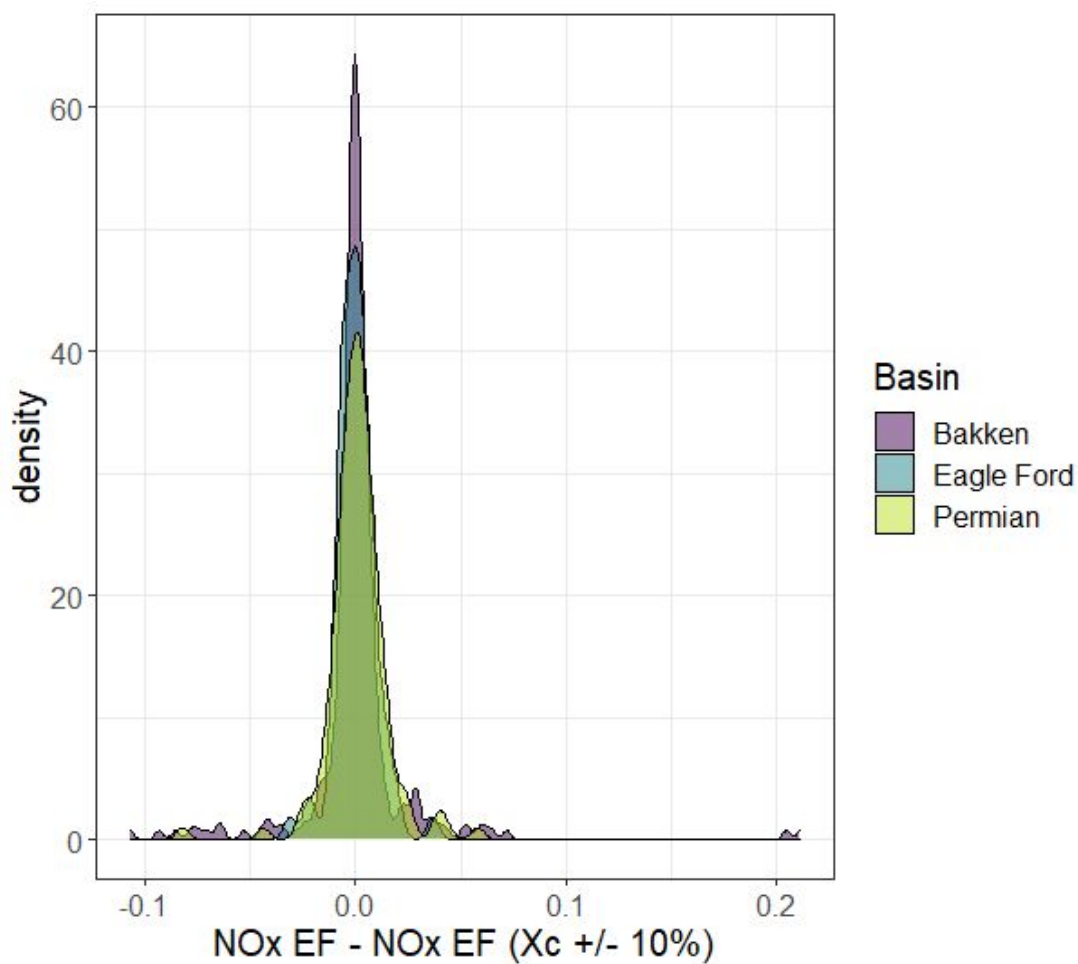

**Figure S2.** Normalized density of the difference in NO<sub>x</sub> EF when using X<sub>c</sub> as defined in Table 1 of the main text and when the value is X<sub>c</sub> is allowed to vary according to a Gaussian distribution with a standard deviation equal to +/- 10%. This standard deviation was chosen to mimic the range of gas compositions between basins. As the basin scale, the mean difference is 0.6, 0.2, and 0.6% and the median is 0.04, -0.5, and 0.6% for the Bakken, Eagle Ford, and Permian, respectively.

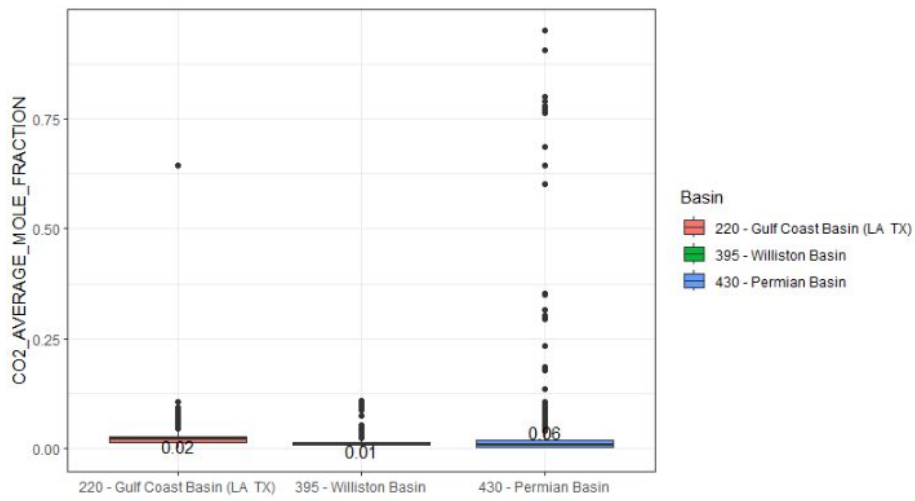

**Figure S3.** Greenhouse Gas Reporting Program (GHGRP) gas composition data (in terms of carbon dioxide, CO<sub>2</sub>, content) for the Bakken (green, Williston Basin), Eagle Ford (red, Gulf Coast Basin), and Permian (blue). Data Source: United States Environmental Protection Agency, GHG Reporting Program Data Sets: (2021), (available at <https://www.epa.gov/ghgreporting/data-sets>).

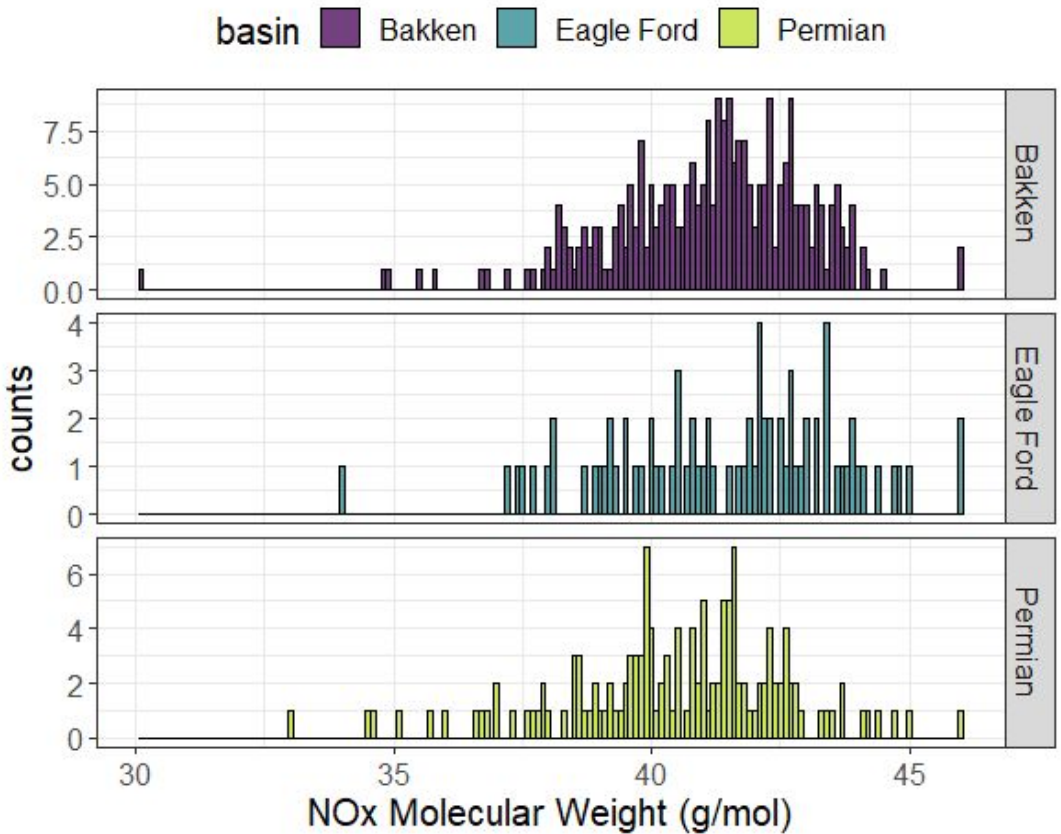

**Figure S4.** NO<sub>x</sub> molecular weights calculated using the observed NO:NO<sub>2</sub> slope, calculated using a model II ranged major axis regression. For the five intercepts where the NO:NO<sub>2</sub> slope was negative, a molecular weight of NO<sub>2</sub> was assigned.

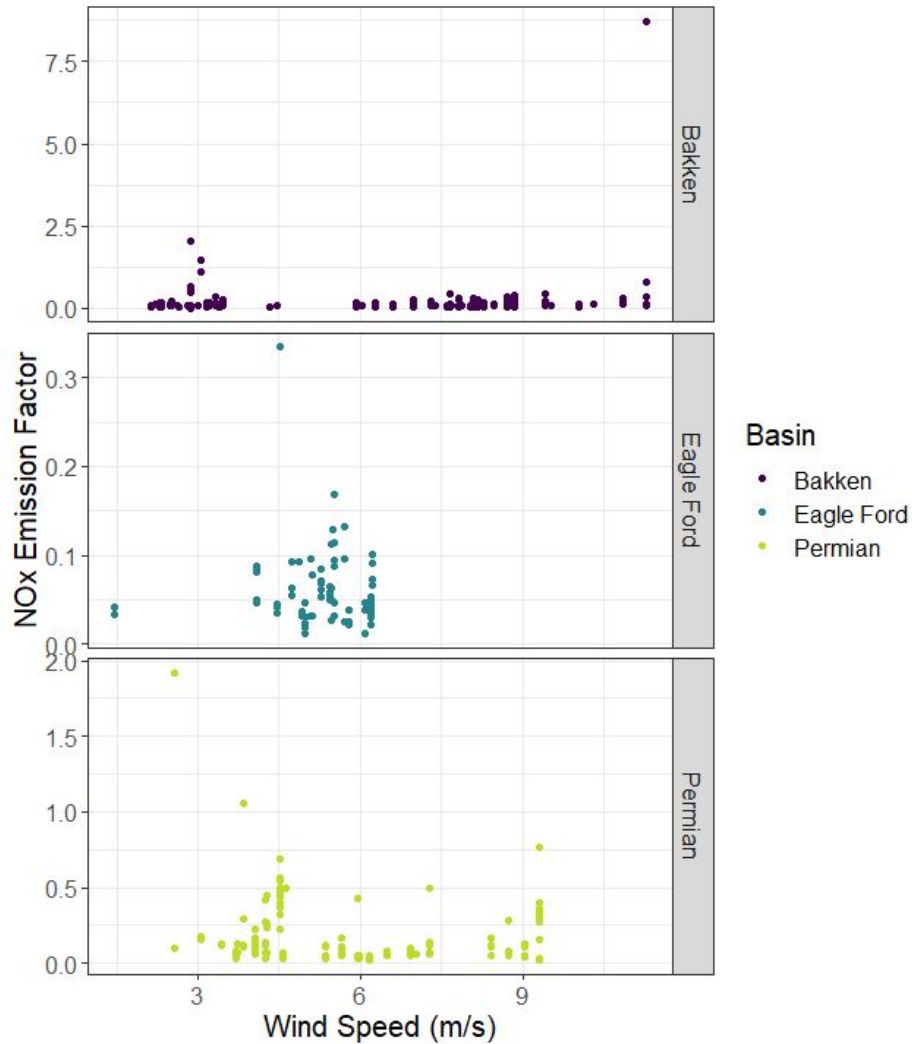

**Figure S5.** NO<sub>x</sub> emission factor (lb NO<sub>x</sub>/10<sup>6</sup> Btu) versus wind speed measured at the aircraft (m/s) for the Bakken ( $R^2 < 0.01$ ,  $p = 0.13$ ), Eagle Ford ( $R^2 < 0.01$ ,  $p = 0.91$ ), and Permian ( $R^2 = 0.05$ ,  $p = 0.008$ ), where the  $R^2$  and  $p$ -value (2-tailed parametric) correspond to an Ordinary Least Squares regression of the data for each basin. Ignoring the highest emission factor in the Bakken does not improve the statistical significance of the relationship between emission factor and wind speed measured at the aircraft ( $R^2 < 0.01$ ,  $p = 0.29$ ).



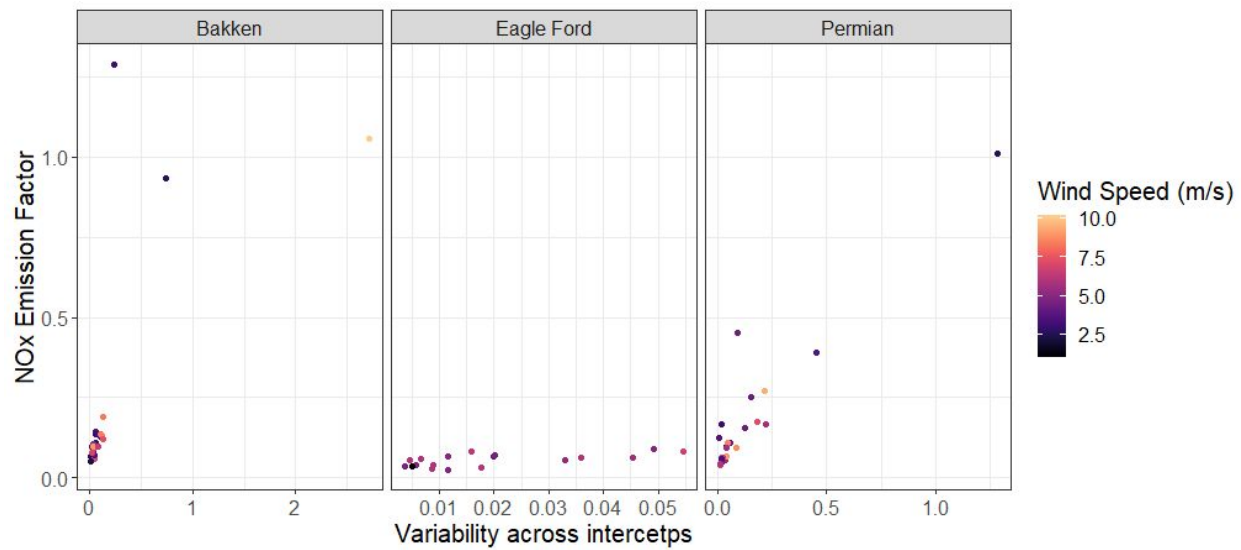

**Figure S6.** NO<sub>x</sub> emission factor (lb NO<sub>x</sub>/10<sup>6</sup> Btu) versus variability (i.e. standard deviation) across multiple intercepts within the same sampling region for the Bakken ( $R^2=0.46$ ,  $p=1e-5$ ), Eagle Ford ( $R^2=0.43$ ,  $p=0.003$ ), and Permian ( $R^2=0.87$ ,  $p=8e-11$ ), where the  $R^2$  and p-value (2-tailed parametric) correspond to an Ordinary Least Squares regression of the data for each basin.

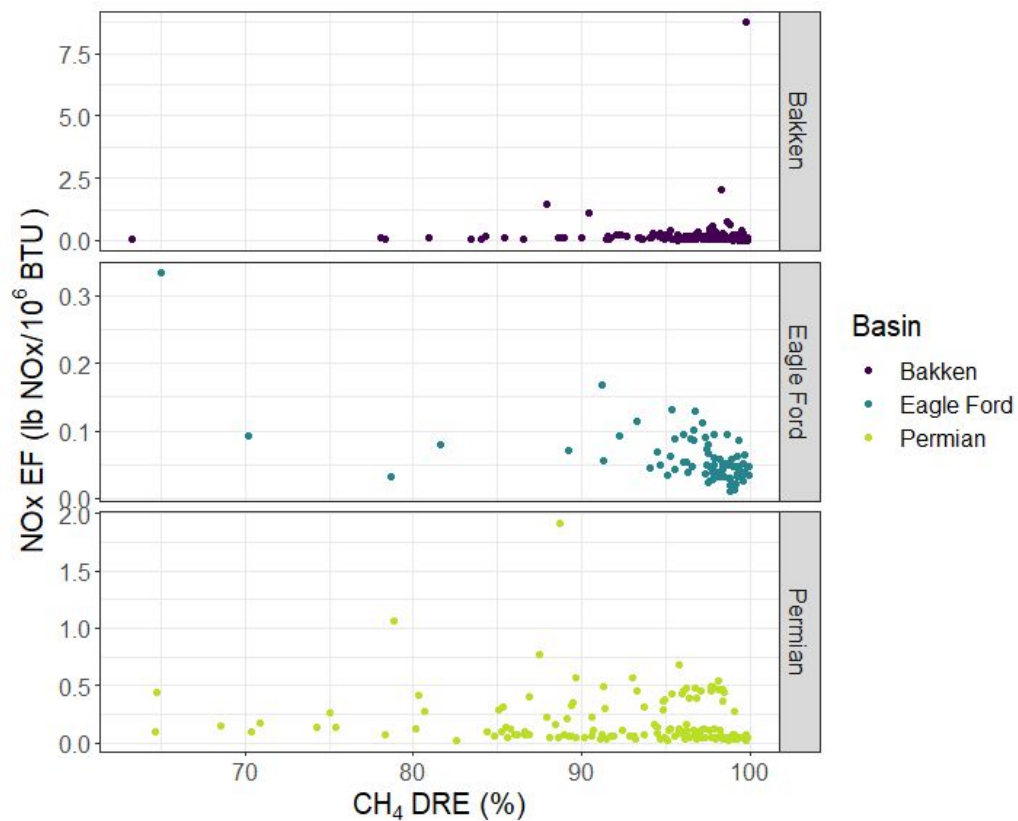

**Figure S7.** NO<sub>x</sub> emission factor (lb NO<sub>x</sub>/10<sup>6</sup> Btu) as a function of estimation methane destruction removal efficiency (as calculated in Plant et al. 2022) for the Bakken ( $R^2 < 0.01$ ,  $p = 0.96$ ), Eagle Ford ( $R^2 = 0.38$ ,  $p = 2e-9$ ), and Permian ( $R^2 = 0.01$ ,  $p = 0.24$ ), where the  $R^2$  and p-value (2-tailed parametric) correspond to an Ordinary Least Squares regression of the data for each basin.

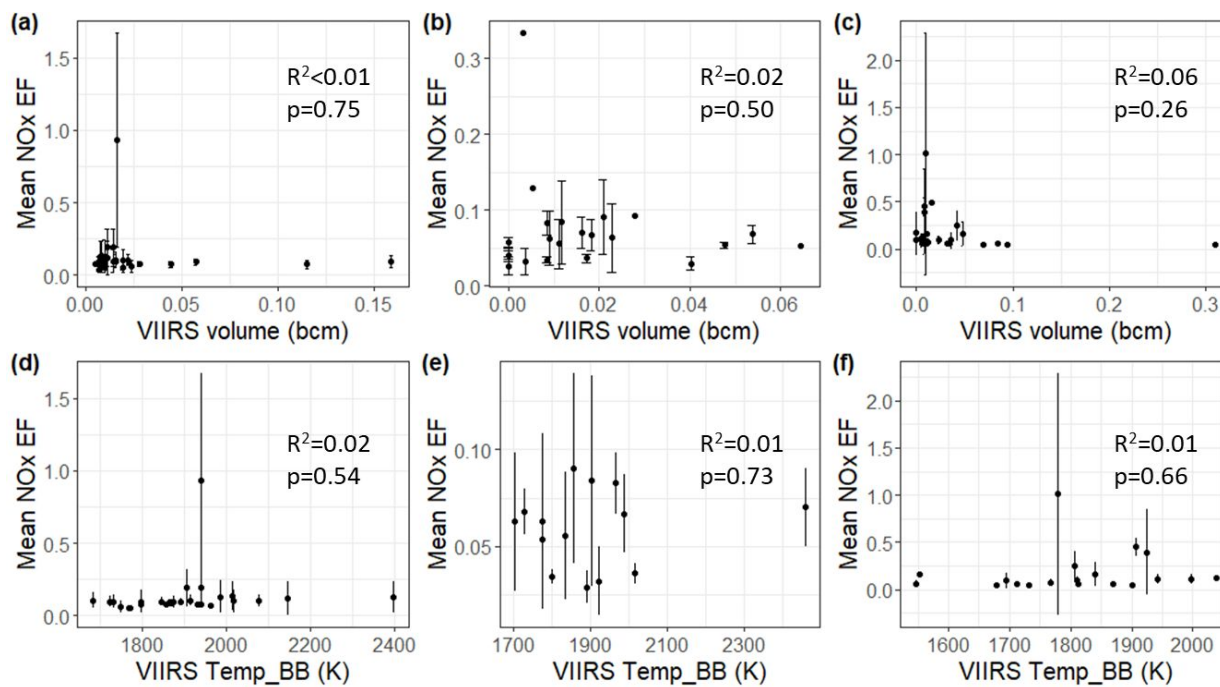

**Figure S8.** Observationally derived NO<sub>x</sub> emission factors (lb NO<sub>x</sub>/10<sup>6</sup> Btu) versus VIIRS-derived flare temperature and volume for the Bakken (panels a,d), Eagle Ford (panels b, e), and Permian (panels c,f).

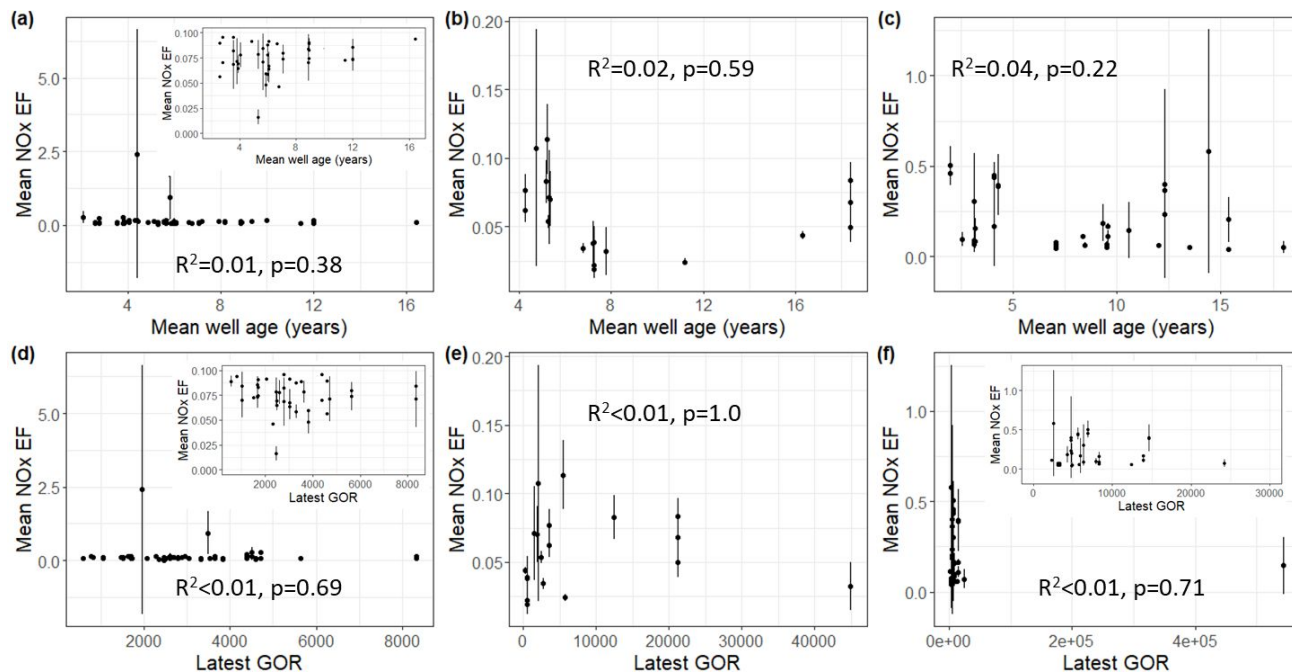

**Figure S9.** Observationally derived NO<sub>x</sub> emission factors (lb NO<sub>x</sub>/10<sup>6</sup> Btu) versus Enverus-linked well age and gas to oil ratio (GOR) for the Bakken (panels a,d), Eagle Ford (panels b, e), and Permian (panels c,f). Insets show zoomed in regions for panels with potential outliers.

**Table S1.** Basin Domain Definitions and Annual Flare Volumes

| <b>Basin</b> | <b>Domain Definition<br/>(°W, °N)</b> | <b>VIIRS 2020 annual<br/>Flare Volume (Bcm)</b> |
|--------------|---------------------------------------|-------------------------------------------------|
| Bakken       | 105.5:102.3, 46.8:49.0                | 3.78                                            |
| Eagle Ford   | 100.5:96.0, 27.7,29.9                 | 1.60                                            |
| Permian      | 104.8:100.3, 30.5:33.6                | 5.22                                            |

**Table S2.** F<sup>3</sup>UEL airborne Sampling Statistics

| <b>Basin</b> | <b># intercepts</b> | <b># flares<br/>(pSize=0.002°)*</b> | <b># NOx intercepts</b> |
|--------------|---------------------|-------------------------------------|-------------------------|
| Bakken       | 383                 | 191                                 | 268                     |
| Eagle Ford   | 103                 | 45                                  | 78                      |
| Permian      | 184                 | 68                                  | 140                     |
| <b>Total</b> | <b>670</b>          | <b>304</b>                          | <b>486</b>              |

\* pSize (units = degrees) denotes the size (+/-) of the domain along the wind direction that is used to assign multiple plume intercepts to a single flare. The value of pSize was chosen based on examples where two flares were visually confirmed.

**Table S3** – Summary Statistics of Observed NO<sub>x</sub>:CO<sub>2</sub> slopes (RMA slope, correlation>0)

|            | <i>Mean</i> | <i>Median</i> | <i>25<sup>th</sup><br/>Quantile</i> | <i>75<sup>th</sup><br/>Quantile</i> | <i>Minimum</i> | <i>Maximum</i> | <i>N</i> |
|------------|-------------|---------------|-------------------------------------|-------------------------------------|----------------|----------------|----------|
| Bakken     | 1.08        | 0.58          | 0.06                                | 0.12                                | 0.07           | 59.2           | 268      |
| Eagle Ford | 0.42        | 0.34          | 0.03                                | 0.07                                | 0.08           | 2.34           | 78       |
| Permian    | 1.34        | 0.70          | 0.05                                | 0.30                                | 0.13           | 13.2           | 140      |

**Table S4.** NOx Emission Factors (EF) calculated using observationally-derived NOx molecular weight and assumption of NOx as NO<sub>2</sub>.

|                                      | <b>NOx<br/>Molecular<br/>Weight</b> | <b>Mean NOx<br/>EF</b> | <b>Median</b> | <b>Min</b> | <b>Max</b> |
|--------------------------------------|-------------------------------------|------------------------|---------------|------------|------------|
| <b>Bakken</b><br><br><b>N = 268</b>  | NO <sub>2</sub>                     | 0.159                  | 0.086         | 0.0105     | 8.74       |
|                                      | Obs. NO:NO <sub>2</sub>             | 0.133                  | 0.077         | 0.010      | 5.72       |
| <b>Eagle Ford</b><br><br><b>N=78</b> | NO <sub>2</sub>                     | 0.060                  | 0.049         | 0.011      | 0.334      |
|                                      | Obs. NO:NO <sub>2</sub>             | 0.053                  | 0.044         | 0.010      | 0.289      |
| <b>Permian</b><br><br><b>N=140</b>   | NO <sub>2</sub>                     | 0.194                  | 0.102         | 0.019      | 1.92       |
|                                      | Obs. NO:NO <sub>2</sub>             | 0.169                  | 0.092         | 0.016      | 1.66       |



**Table S5.** Basin-level NO<sub>x</sub> Flaring Emissions for 2020 compared to FOG Inventory.

| <i>Basin</i> | <i>F<sup>3</sup>UEL<br/>(metric ton/day)<br/>[95% CI]</i> | <i>FOG<br/>(metric ton/day)</i> |
|--------------|-----------------------------------------------------------|---------------------------------|
| Bakken       | 33.8 [22.2, 54.6]                                         | 8.2                             |
| Eagle Ford   | 4.5 [3.6, 5.6]                                            | 3.6                             |
| Permian      | 52.2 [40.7, 65.1]                                         | 11.3                            |

**Table S6.** Sectoral Breakdown of FOG NOx Inventory for 2020.

| <i>Basin</i> | <i>Total<br/>NOx</i> | <i>Flaring</i> | <i>Drill Rigs</i> | <i>Dehydrators</i> | <i>Heaters</i> | <i>Artificial<br/>Lift</i> | <i>Lateral<br/>Compressors</i> | <i>Wellhead<br/>Compressors</i> |
|--------------|----------------------|----------------|-------------------|--------------------|----------------|----------------------------|--------------------------------|---------------------------------|
| Bakken       | 34.7                 | 8.2            | 13.8              | 0.3                | 1.0            | 8.5                        | 2.7                            | 0.2                             |
| Eagle Ford   | 86.4                 | 3.6            | 18.3              | 0.8                | 2.5            | 10.1                       | 7.1                            | 44.0                            |
| Permian      | 276.1                | 11.3           | 71.6              | 2.3                | 7.5            | 56.6                       | 19.8                           | 107.0                           |
